# Supplementary material for: A transcriptome-wide association study of Alzheimer’s disease using prediction models of relevant tissues identifies novel candidate susceptibility genes
Source: PubMed Central journal article supplement (PMC8408990; doi:10.1186/s13073-021-00959-y), 2021-09-01
Supplement: 13073_2021_959_MOESM12_ESM.pdf [file 13073_2021_959_MOESM12_ESM.pdf]

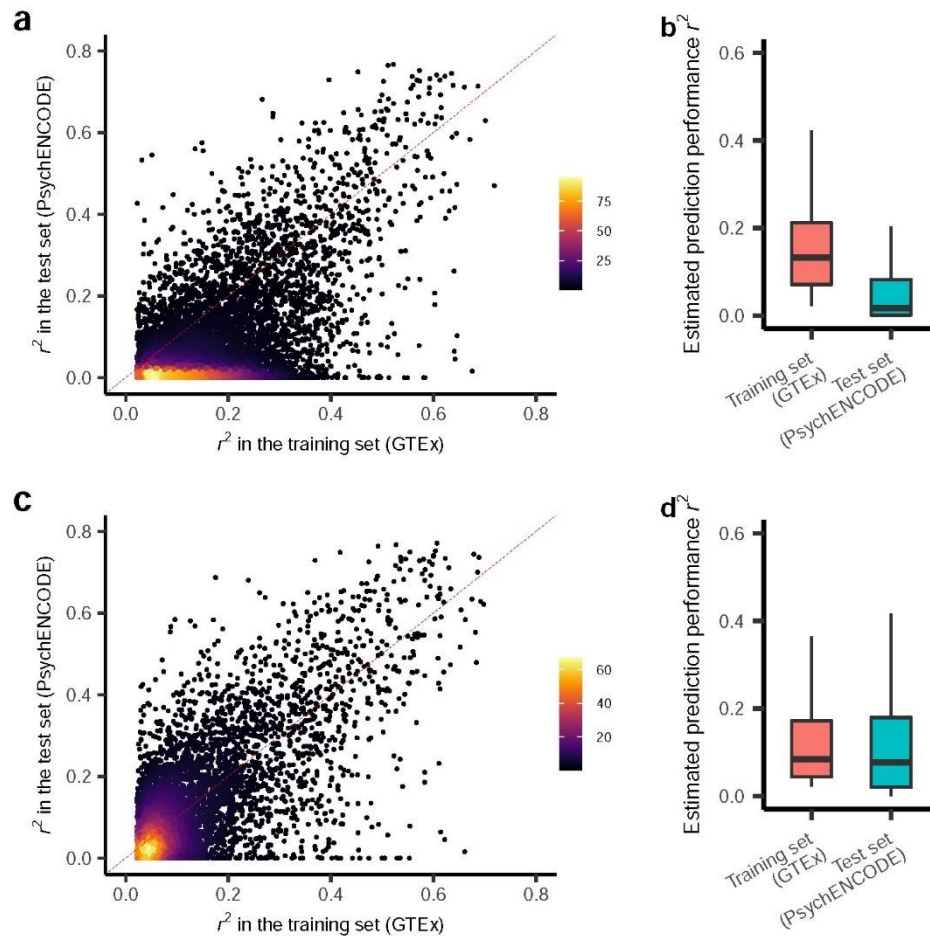

**Figure S1. Prediction performance ( $r^2$ ) comparison between the training set (GTEx, brain frontal cortex BA9) and the test set (PsychENCODE, brain prefrontal cortex).** The performance of the original UTMOST model (a and b) and that of the modified UTMOST model (c and d) were compared. The horizontal and vertical axes of the scatter plots (a and c) denote the prediction performance ( $r^2$ ) estimated in GTEx (the training and cross-validation set) and in PsychENCODE (an external test data set), respectively. The yellow, red, and black dots indicate high, medium, and low density. The distribution of the prediction performance ( $r^2$ ) is shown in the boxplot (b and d). The median of the performance is visualized as a black segment in the middle of the box. The lower and upper hinges correspond to the first and third quartiles (the 25th and 75th percentiles). The upper / lower whisker extends from the hinge to the largest / smallest value no further than / at most  $1.5 \times \text{IQR}$  from the hinge

(where IQR is the inter-quartile range or the distance between the first and third quartiles).
